# Supplementary material for: Clinico-pathological findings in a striped dolphin (Stenella coeruleoalba) affected by rhabdomyolysis and myoglobinuric nephrosis (capture myopathy)
Source: PubMed Central journal article supplement — J Vet Med Sci. 2017 Apr 21;79(6):1013–8. doi: 10.1292/jvms.17-0023 (PMC5487775; doi:10.1292/jvms.17-0023), 2017-04-21
Supplement: jvms-79-1013-s001.pdf [file jvms-79-1013-s001.pdf]

## Supplementary material

**Table S1.** Haematological variables in the striped dolphin. Haematological values are compared to the reference intervals of free-ranging, age-matched bottlenose dolphins [12]. SI = système international d'unités; HTC = hematocrit; RBC = red blood cells; MCV = mean cell volume; MCH = mean cell hemoglobin; MCHC= mean cell hemoglobin concentration; RDW = red cell distribution width; PLT= platelets; WBC = white blood cell. **Bold;** the value outside the reference intervals.

|                    | SI Units                 | Striped dolphin<br>( <i>Stenella coeruleoalba</i> ) | Reference Intervals |
|--------------------|--------------------------|-----------------------------------------------------|---------------------|
| <b>HCT</b>         | %                        | 40.6                                                | 37-47               |
| <b>RBC</b>         | $10^{12} \text{ L}^{-1}$ | 3.75                                                | 3.2-4               |
| <b>Hemoglobin</b>  | g L <sup>-1</sup>        | 148                                                 | 129-158             |
| <b>MCV</b>         | fL                       | 108.2                                               | 101-127             |
| <b>MCH</b>         | pg                       | 39.4                                                | 36-44               |
| <b>MCHC</b>        | g dL <sup>-1</sup>       | 36.4                                                | 32-37               |
| <b>RDW</b>         | %                        | 14.2                                                | 11.3-15.9           |
| <b>PLT</b>         | $10^9 \text{ L}^{-1}$    | 260                                                 | 110-277             |
| <b>WBC</b>         | $10^6 \text{ L}^{-1}$    | 8.28                                                | 6.4-18.1            |
| <b>Neutrophils</b> | $10^6 \text{ L}^{-1}$    | 5.2                                                 | 2.2-7.5             |
| <b>Lymphocytes</b> | $10^6 \text{ L}^{-1}$    | 1.9                                                 | 1.1-4.5             |
| <b>Monocyte</b>    | $10^6 \text{ L}^{-1}$    | 0.3                                                 | 0.0-0.8             |
| <b>Eosinophils</b> | $10^6 \text{ L}^{-1}$    | <b>0.9</b>                                          | 1.3-8.4             |
| <b>Basophils</b>   | $10^6 \text{ L}^{-1}$    | 0.0                                                 | 0.0-0.6             |
